# Supplementary material
Source: HighWire-hosted journal article supplement (https://www.annfammed.org/highwire/filestream/14172/field_highwire_adjunct_files/0/Matulis-inno.pdf)
Supplement: Matulis-inno.pdf [file Matulis-inno.pdf]

## **Supplemental materials for**

Matulis III JC, Barakat S. Implementation of a "cases and conundrums" conference among early career internal medicine clinicians. *Ann Fam Med.* 2021;19(6):560.

**Key words:** primary health care; diagnosis; social isolation; clinical conference

Submitted March 29, 2021; submitted, revised, May 23, 2021; accepted June 3, 2021.

**Author contributions:** Dr Matulis is a consultant and Assistant Professor of Medicine at Mayo Clinic in Rochester, Minnesota. He conceptualized and led the design and evaluation of the project, drafted, revised, and finalized the current manuscript. Dr Barakat is a consultant at Mayo Clinic and an Instructor of Medicine at Mayo Clinic, Rochester, Minnesota. She conceptualized and planned the project with Dr Matulis. She assisted with planning, organization, writing, and finalization of the manuscript. She reviewed and revised all sections of the manuscript, and approved the final manuscript as submitted.

**Financial support:** We received a Mayo Clinic Internal grant of \$1,500 to support food purchases for the cases and conundrums conference.

**Previous presentation:** Poster presentation at the Society for Improvement of Diagnosis in Medicine Annual Meeting, October 19-21, 2020
